# Supplementary material for: Comparison of Three Cellular Assays to Predict the Course of CMV Infection in Liver Transplant Recipients
Source: PubMed Central journal article supplement (PMC7911226; doi:10.3390/vaccines9020088), 2021-01-25
Supplement: vaccines-09-00088-s001.pdf [file vaccines-09-00088-s001.pdf]

**Supplementary Table 1.** CMV-DNAemia in CMV IgG donor +/-recipient - liver transplant recipients with viral replication.

| ID | M0 | M1    | M2   | M3   | M4   | M5   | M6   |
|----|----|-------|------|------|------|------|------|
| 1  | Ø  | 11172 | 290  | Ø    | Ø    | Ø    | n.t. |
| 2  | Ø  | Ø     | 6696 | Ø    | Ø    | Ø    | n.t. |
| 3  | Ø  | Ø     | Ø    | 1286 | 2007 | Ø    | Ø    |
| 4  | Ø  | Ø     | 1006 | 173  | Ø    | Ø    | Ø    |
| 5  | Ø  | 381   | Ø    | Ø    | Ø    | Ø    | Ø    |
| 6  | Ø  | Ø     | Ø    | 154  | 321  | 50   | Ø    |
| 7  | Ø  | Ø     | 259  | 101  | Ø    | Ø    | Ø    |
| 8  | Ø  | Ø     | 258  | Ø    | n.t. | n.t. | Ø    |

This table extends the data on CMV-DNAemia as presented in Table 3 and displays monthly data on DNA load testing. Eight out of 14 CMV IgG donor +/-recipient - liver transplant recipients (ID 1-8) showed viral replication after the end of prophylaxis. Viral load is given as copies/ml. M - month after the end of antiviral prophylaxis; Ø - below the detection limit of 40 copies/ml (62.4 IU/ml); n.t. - not tested. Maximum values are highlighted red.

**Supplementary Table 2.** Receiver Operating Characteristic (ROC) curve analyses to define the cellular assay, which is most predictive of protection from CMV infection/reactivation in liver transplant recipients.

| All              | Month 0              |      |      |          |        | Month 1 |      |      |          |        |    |
|------------------|----------------------|------|------|----------|--------|---------|------|------|----------|--------|----|
|                  | Cut-off 40 copies/ml | AUC  | SE   | <i>p</i> | 95% CI |         | AUC  | SE   | <i>p</i> | 95% CI |    |
|                  |                      |      |      |          | LL     | UL      |      |      |          | LL     | UL |
| IE-1 Lo (Algo)   | .517                 | .084 | .836 | .353     | .682   | .575    | .090 | .427 | .399     | .751   |    |
| pp65 Lo (Algo)   | .545                 | .084 | .589 | .380     | .710   | .508    | .091 | .930 | .330     | .686   |    |
| IE-1 Lo (Median) | .532                 | .084 | .702 | .368     | .696   | .574    | .089 | .435 | .399     | .749   |    |
| pp65 Lo (Median) | .548                 | .084 | .569 | .383     | .712   | .504    | .091 | .970 | .326     | .682   |    |
| IE-1 OI          | .525                 | .084 | .768 | .361     | .688   | .549    | .091 | .605 | .371     | .726   |    |
| pp65 OI          | .612                 | .083 | .178 | .450     | .775   | .512    | .091 | .900 | .334     | .690   |    |
| QuantiFERON      | .482                 | .084 | .829 | .317     | .647   | .352    | .093 | .118 | .170     | .534   |    |

  

| All              | Month 0               |      |      |          |        | Month 1 |      |      |          |        |    |
|------------------|-----------------------|------|------|----------|--------|---------|------|------|----------|--------|----|
|                  | Cut-off 500 copies/ml | AUC  | SE   | <i>p</i> | 95% CI |         | AUC  | SE   | <i>p</i> | 95% CI |    |
|                  |                       |      |      |          | LL     | UL      |      |      |          | LL     | UL |
| IE-1 Lo (Algo)   | .668                  | .080 | .117 | .511     | .825   | .762    | .082 | .059 | .601     | .922   |    |
| pp65 Lo (Algo)   | .669                  | .101 | .115 | .471     | .868   | .603    | .165 | .460 | .279     | .926   |    |
| IE-1 Lo (Median) | .698                  | .081 | .065 | .539     | .856   | .772    | .082 | .050 | .610     | .933   |    |
| pp65 Lo (Median) | .675                  | .103 | .103 | .473     | .877   | .610    | .163 | .427 | .291     | .930   |    |
| IE-1 OI          | .636                  | .087 | .207 | .465     | .806   | .659    | .133 | .252 | .399     | .919   |    |
| pp65 OI          | .744                  | .074 | .023 | .599     | .888   | .687    | .136 | .177 | .420     | .955   |    |
| QuantiFERON      | .568                  | .099 | .528 | .373     | .762   | .605    | .121 | .448 | .367     | .843   |    |

  

| D+/R-            | Month 0              |      |       |          |        | Month 1 |      |      |          |        |    |
|------------------|----------------------|------|-------|----------|--------|---------|------|------|----------|--------|----|
|                  | Cut-off 40 copies/ml | AUC  | SE    | <i>p</i> | 95% CI |         | AUC  | SE   | <i>p</i> | 95% CI |    |
|                  |                      |      |       |          | LL     | UL      |      |      |          | LL     | UL |
| IE-1 Lo (Algo)   | .500                 | .161 | 1.000 | .185     | .815   | .200    | .151 | .100 | .000     | .495   |    |
| pp65 Lo (Algo)   | .375                 | .152 | .439  | .077     | .673   | .233    | .160 | .144 | .000     | .547   |    |
| IE-1 Lo (Median) | .448                 | .158 | .747  | .138     | .758   | .250    | .161 | .171 | .000     | .565   |    |
| pp65 Lo (Median) | .406                 | .156 | .561  | .101     | .712   | .233    | .160 | .144 | .000     | .547   |    |
| IE-1 OI          | .250                 | .133 | .121  | .000     | .511   | .100    | .114 | .028 | .000     | .323   |    |
| pp65 OI          | .469                 | .162 | .846  | .151     | .786   | .233    | .160 | .144 | .000     | .547   |    |
| QuantiFERON      | .438                 | .158 | .699  | .128     | .747   | .200    | .151 | .100 | .000     | .495   |    |

  

| D+/R-            | Month 0               |      |      |          |        | Month 1 |      |       |          |        |    |
|------------------|-----------------------|------|------|----------|--------|---------|------|-------|----------|--------|----|
|                  | Cut-off 500 copies/ml | AUC  | SE   | <i>p</i> | 95% CI |         | AUC  | SE    | <i>p</i> | 95% CI |    |
|                  |                       |      |      |          | LL     | UL      |      |       |          | LL     | UL |
| IE-1 Lo (Algo)   | .513                  | .179 | .944 | .162     | .863   | .667    | .187 | .480  | .300     | 1.000  |    |
| pp65 Lo (Algo)   | .700                  | .142 | .258 | .421     | .979   | .722    | .169 | .346  | .391     | 1.000  |    |
| IE-1 Lo (Median) | .550                  | .180 | .777 | .198     | .902   | .722    | .169 | .346  | .391     | 1.000  |    |
| pp65 Lo (Median) | .763                  | .134 | .138 | .500     | 1.000  | .722    | .169 | .346  | .391     | 1.000  |    |
| IE-1 OI          | .375                  | .172 | .480 | .037     | .713   | .500    | .205 | 1.000 | .097     | .903   |    |
| pp65 OI          | .588                  | .181 | .621 | .232     | .943   | .722    | .169 | .346  | .391     | 1.000  |    |
| QuantiFERON      | .550                  | .169 | .777 | .218     | .882   | .667    | .187 | .480  | .300     | 1.000  |    |

CMV infection/reactivation was either defined as  $\geq 40$  copies or  $\geq 500$  copies of CMV-DNA/ml. The upper panel considers all patients, the lower only high-risk patients [donor (D)+/recipient (R)- CMV-IgG serostatus prior to transplantation (D+/R-)]. CMV-specific ELISpot results were considered as spot forming units for CMV IE-1 and pp65 antigens, either at the end of antiviral prophylaxis (month 0) or at month 1. Patients who developed CMV infection/reactivation between end of prophylaxis and month 1 were excluded from the ROC curve analysis at month 1. Results of the T-Track CMV (Lophius Biosciences, Lo) were calculated using the algorithm provided by the manufacturer (Algo) or using median values. OI means results of the T-SPOT.CMV (Oxford Immunotec). Data sets also presented in Table 4 were marked grey. SE - standard error; CI - confidence interval; LL - lower limit; UL - upper limit.

**Supplementary Table 3.** Predictive values of CMV-specific cellular assays in liver transplant recipients.

| Test             | AUC  | Cohort | Time point | Cut-off | Sensitivity | Specificity | $n_c$ | $n_t$ | $n_c/n_t$ |
|------------------|------|--------|------------|---------|-------------|-------------|-------|-------|-----------|
| IE-1 Lo (Algo)   | .668 | All    | M0         | 5.5     | 100%        | 44%         | 19    | 51    | 0.37      |
| pp65 Lo (Algo)   | .669 | All    | M0         | 284     | 100%        | 7%          | 3     | 51    | 0.06      |
| IE-1 Lo (Median) | .698 | All    | M0         | 5.5     | 100%        | 46%         | 20    | 51    | 0.39      |
| pp65 Lo (Median) | .675 | All    | M0         | 342     | 100%        | 5%          | 2     | 51    | 0.04      |
| IE-1 OI          | .636 | All    | M0         | 91      | 100%        | 20%         | 8     | 50    | 0.16      |
| pp65 OI          | .744 | All    | M0         | 142     | 100%        | 46%         | 19    | 50    | 0.38      |
| QuantiFERON      | .568 | All    | M0         | 9.9     | 100%        | 22%         | 10    | 56    | 0.18      |
| IE-1 Lo (Algo)   | .762 | All    | M1         | 3.5     | 100%        | 59%         | 25    | 48    | 0.52      |
| pp65 Lo (Algo)   | .603 | All    | M1         | 470     | 100%        | 3%          | 1     | 48    | 0.02      |
| IE-1 Lo (Median) | .772 | All    | M1         | 4.5     | 100%        | 59%         | 25    | 48    | 0.52      |
| pp65 Lo (Median) | .610 | All    | M1         | 471     | 100%        | 3%          | 1     | 48    | 0.02      |
| IE-1 OI          | .659 | All    | M1         | 153     | 100%        | 15%         | 6     | 46    | 0.13      |
| pp65 OI          | .687 | All    | M1         | 311     | 100%        | 20%         | 8     | 45    | 0.18      |
| QuantiFERON      | .605 | All    | M1         | 32      | 100%        | 23%         | 9     | 47    | 0.19      |
| IE-1 Lo (Algo)   | .513 | D+R-   | M0         | 4.0     | 100%        | 10%         | 1     | 14    | 0.07      |
| pp65 Lo (Algo)   | .700 | D+R-   | M0         | 0.5     | 100%        | 40%         | 4     | 14    | 0.29      |
| IE-1 Lo (Median) | .550 | D+R-   | M0         | 5.0     | 100%        | 10%         | 1     | 14    | 0.07      |
| pp65 Lo (Median) | .763 | D+R-   | M0         | 1.5     | 100%        | 30%         | 3     | 14    | 0.21      |
| IE-1 OI          | .375 | D+R-   | M0         | 5.5     | 100%        | 10%         | 1     | 14    | 0.07      |
| pp65 OI          | .588 | D+R-   | M0         | 30      | 100%        | 10%         | 1     | 14    | 0.07      |
| QuantiFERON      | .550 | D+R-   | M0         | 13      | 100%        | 10%         | 1     | 14    | 0.07      |
| IE-1 Lo (Algo)   | .667 | D+R-   | M1         | 0.5     | 100%        | 33%         | 3     | 12    | 0.25      |
| pp65 Lo (Algo)   | .722 | D+R-   | M1         | 0.5     | 100%        | 44%         | 4     | 12    | 0.33      |
| IE-1 Lo (Median) | .722 | D+R-   | M1         | 0.5     | 100%        | 44%         | 4     | 12    | 0.33      |
| pp65 Lo (Median) | .722 | D+R-   | M1         | 0.5     | 100%        | 44%         | 4     | 12    | 0.33      |
| IE-1 OI          | .500 | D+R-   | M1         | 2.5     | 100%        | 33%         | 3     | 12    | 0.25      |
| pp65 OI          | .722 | D+R-   | M1         | 3.5     | 100%        | 44%         | 4     | 12    | 0.33      |
| QuantiFERON      | .667 | D+R-   | M1         | 19      | 100%        | 33%         | 3     | 12    | 0.25      |

It was analyzed how different CMV-specific cellular assays predicted the absence of CMV infection/reactivation. For this analysis, the cut-off for CMV infection/reactivation was set at 500 copies of CMV-DNA/ml. The table considers all cellular in vitro assays. It shows either data on all high and intermediate risk patients (All) or separately on high risk patients [donor (D)+ recipient (R)- CMV-IgG serostatus prior to transplantation]. CMV-specific ELISpot results were considered as spot forming units for CMV IE-1 and pp65 antigens, either at the end of antiviral prophylaxis (M0) or at month 1 (M1). Results of the T-Track CMV (Lophius Biosciences, Lo) were calculated using the algorithm provided by the manufacturer (Algo) or using median values. OI means results of the T-SPOT.CMV (Oxford Immunotec). Results of the QuantiFERON-CMV assay were given as IU/ml. Data sets also presented in Table 4 were marked grey. AUC - area under curve;  $n_c$  - number of patients exceeding the cut-off value;  $n_t$  - total number of patients.
